# Supplementary material
Source: Springer Nature journal article supplement (https://www.springermedizin.de/resource/supplementary/12943_2010_756_MOESM4_ESM.pdf/9554758)

Ad/Ah Neo

Ad/Ah EBNA1

Ad/Ah EBV

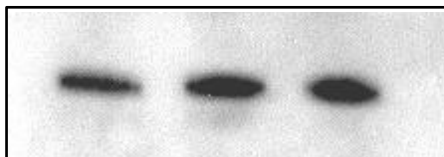

TFIIIC220

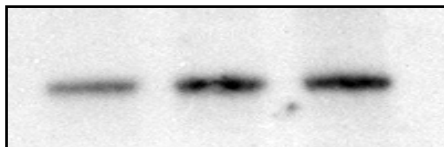

TFIIIC110

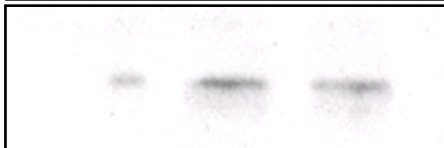

TFIIIC90

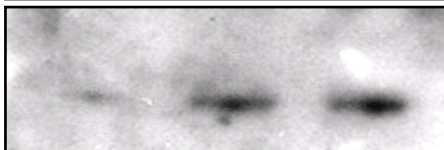

TFIIIC63

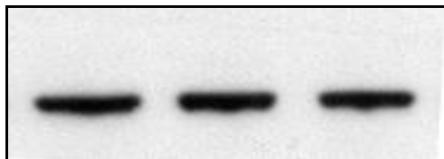

Actin

Supplement: MOESM4 [file 9554758]
